1 **Title:** Impacts of development and adult sex on brain cell numbers in the Black Soldier Fly,  
2 *Hermetia illucens* L. (Diptera: Stratiomyidae)

3

4 **Authors:** Meghan Barrett<sup>1\*</sup>, R. Keating Godfrey<sup>2</sup>, Emily J. Sterner<sup>1</sup>, Edward A. Waddell<sup>3</sup>

5

6 <sup>1</sup>Department of Biology, Drexel University, 3245 Chestnut St, Philadelphia PA 19104

7 <sup>2</sup>Department of Neuroscience, University of Arizona, 1200 E. University Blvd, Tucson AZ 85721

8 <sup>3</sup>Department of Biology, Holy Family University, 9801 Frankford Ave, Philadelphia PA 19114

9

10 \*Corresponding author: Meghan Barrett (meghan.barrett21@gmail.com) Department of Biology,  
11 Drexel University, 3245 Chestnut St, Philadelphia PA 19104

12

13 **Abstract**

14 The Black Soldier Fly (*Hermetia illucens*, Diptera: Stratiomyidae) has been introduced across the globe,  
15 with numerous industry applications predicated on its tremendous growth during the larval stage.  
16 However, basic research on *H. illucens* biology (for example, studies of their central nervous system)  
17 are lacking. Despite their small brain volumes, insects are capable of complex behaviors;  
18 understanding how these behaviors are completed with such a small amount of neural tissue requires  
19 understanding processing power (e.g. number of cells) within the brain. Brain cell counts have been  
20 completed in only a few insect species (mostly Hymenoptera), and almost exclusively in adults. This  
21 limits the taxonomic breadth of comparative analyses, as well as any conclusions about how  
22 development and body size growth may impact brain cell populations. Here, we present the first  
23 images and cell counts of the *H. illucens* brain at four time points across development (early, mid, and  
24 late larval stages, and both male and female adults) using immunohistochemistry and isotropic  
25 fractionation. To assess sexual dimorphism in adults, we quantified the number of cells in the central  
26 brain vs. optic lobes of males and females separately. To assess if increases in body size during  
27 development might independently affect different regions of the CNS, we quantified the larval  
28 ventral nerve cord and central brain separately at all three stages. Together, these data provide the  
29 first description of the nervous system of a popular, farmed invertebrate and the first study of brain  
30 cell numbers using IF across developmental stages in any insect.

31

32 **Keywords:** Brain cell number, Black Soldier Fly, Isotropic Fractionation, Sexual Dimorphism

33

34

## 35 **Introduction**

36           The Black Soldier Fly (*Hermetia illucens*, Diptera: Stratiomyidae) is a tropical species native to  
37 Central and South America that has been introduced across the globe due to its industry applications  
38 (Marshall et al. 2015, Kaya et al. 2021). *H. illucens* larvae are actively being explored for use as  
39 livestock feed; fishmeal replacements; biodiesel; human, animal, and food waste management; and  
40 even as a source of sustainable human protein (Sheppard et al. 1994, Banks 2014, Widjastuti et al.  
41 2014, Cheng et al. 2017, Julita et al. 2018, Chia et al. 2019, Lee et al. 2021, Hopkins et al. 2021). An  
42 estimated 200 billion larvae are reared annually as of 2020 (Rowe 2020). The recent ascent of *H.*  
43 *illucens* to a place of economic significance means that basic research on their biology is lacking.  
44 Particularly, there have been no studies of their central nervous system, although these data could  
45 aid in understanding both their development and behaviors.

46           Despite their small sizes, insect brains are capable of supporting remarkably diverse and  
47 sophisticated behaviors: learning, long-term memory, processing multimodal sensory information,  
48 navigation, foraging in complex terrain, tool use, courtship, nestmate chemical/facial recognition,  
49 and more (Pierce 1986, Detrain et al. 1999, Dukas et al. 2006, van Zweden & d’Ettorre 2010,  
50 Sheehan & Tibbets 2011, Ritzman et al. 2012, Giurfa 2015, Buehlmann et al. 2020). Understanding  
51 how these behaviors can be completed with such a small amount of neural tissue requires  
52 understanding processing power (e.g. number of cells) within the brain. Brain cell counts have been  
53 completed for a remarkably small number of insects due to methodological challenges recently  
54 resolved through the application of the isotropic fractionation (IF; Herculano-Houzel & Lent 2005)  
55 method to insect brains (Godfrey et al. 2021).

56           Development, diet, body size, cognitive abilities, metabolic limitations, and more have  
57 currently unexplored effects on brain size, as measured by cell number or density. *H. illucens* is a  
58 particularly excellent system for understanding how larval body size scales with brain cell

59 development; larvae have incredible bioconversion rates (Surendra et al. 2016), with a greater than  
60 50-fold change in body weight between the third and sixth larval instar (when fed standard *Drosophila*  
61 *melanogaster* food diets; Kim et al. 2010). In addition, while adult males and females do not appear  
62 obviously dimorphic in their external anatomy outside of females' larger body sizes, behavioral  
63 variation related to mating (Tingle et al. 1975, Copello 1926, Julita et al. 2020) could generate sexual  
64 dimorphism in functionally discrete regions of the brain.

65 Here, we present the first images of the larval and adult *H. illucens* brain. We quantify  
66 changes in total brain cell number at four time points across development (early, mid, and late larval  
67 stages, and both male and female adults). We determine the number of cells in the central brain  
68 versus optic lobes of male and female adults (to look for sexual dimorphism in the visual system),  
69 and quantified the larval ventral nerve cord separately from the brain. Together, these data provide  
70 the first description of the nervous system of a popular, farmed invertebrate and close relation of *D.*  
71 *melanogaster*, and the first study of brain cell numbers using IF across developmental stages in any  
72 insect.

## 73 **Materials and Methods**

### 74 Rearing and Collection

75 For larval stages 1 and 4, black soldier fly eggs were obtained from ReptiWorms (Chico,  
76 California). 0-24 hour old larvae were placed on a standard *Drosophila* larval food recipe (as in Kim et  
77 al. 2010) in an incubator at 25 °C and 50% RH with 24 hours of darkness. Larvae were collected and  
78 stored whole in Prefer fixative at 0 - 24 hours (L1) and 10-11 days old (approximately L4).

79 L6 larvae were either reared and collected from the ReptiWorms population at 36-37 days  
80 old (L6), or obtained from Sympton Black Soldier Fly (College Station, Texas). L6 were immediately  
81 cut in half and stored in Prefer fixative. Additional larvae from the Sympton BSF population were  
82 kept at 26 - 29 °C, 35 - 60% RH, and 12 - 12 light-dark until eclosion. Adults were collected within

83 96 hours of eclosion and anesthetized in a jar with a cotton ball soaked in isoflurane, prior to the  
84 removal of the head capsule. Heads were stored in Prefer fixative for a minimum of three days  
85 before dissection.

86 L1 larvae were too small to be weighed accurately, but were assumed to weigh the same  
87 amount as an egg (25  $\mu$ g; Dortsman et al. 2017). Wet masses of fixed L4 (n = 3) and L6 (n = 24)  
88 larvae were obtained to the nearest 0.01 mg on an analytical balance (Mettler Toledo AT261;  
89 Marshall Scientific, Hampton, NH, USA) prior to dissection; larvae were blotted dry of excess  
90 fixative before weighing. A subset of larvae from various instars were weighed before and after  
91 fixation, and fixation was found not to majorly impact wet mass (linear regression, [fixed mass] =  
92 0.996 [pre-fixation mass], n = 27,  $R^2 = 0.999$ ). L1 and L4 larvae were also too small to have their  
93 head widths accurately recorded. The head width of L6 larvae was measured to the nearest 0.01 mm  
94 using digital calipers. Adult flies were sexed, weighed to the nearest 0.01 mg, and their head width at  
95 the widest point, and head height, were measured to the nearest 0.01 mm using digital calipers.

#### 96 Dissection & Isotropic Fractionation

97 Brains were dissected in Phosphate Buffer Solution (PBS; MP Biomedicals LLC). Adult  
98 optic lobes (OL) were separated from the central brain (CB), and the retinas were removed. Ultra  
99 Fine Clipper Scissors II (Fine Science Tools) were used to separate the larval ventral nerve cord  
100 (VNC) from the brain. Dissected brains were stored at 4 °C in PBS for 24 hours. Adult brains were  
101 carefully blotted dry with a Kimwipe and the OL and CB weighed separately to the nearest 0.01 mg  
102 on an analytical balance in 80% glycerol to minimize evaporation.

103 As in Godfrey et al. (2021), brain tissue was homogenized in a glass tissue homogenizer with sodium  
104 citrate and Triton X detergent solution, diluted with PBS. Nuclei were labelled with the fluorescent  
105 probe, SYTOX Green (ThermoFischer Scientific), then counted with a haemocytometer under  
106 epifluorescence using a 40x/0.65 M27 objective on a Zeiss Axioplan microscope. Twelve

107 subsamples of each homogenized brain region were counted and averaged to provide a mean  
108 number of brain cells in that brain region. Cell density was obtained by dividing the mean number of  
109 nuclei for a given brain region by the mass of that brain region (assuming one nucleus per brain cell).  
110 Each adult's OL and CB were counted separately (n = 12 females, 11 males). For L6 larvae, the  
111 VNC or brain for three individuals were homogenized simultaneously (due to the small cell numbers  
112 in each individual), and the final count divided by three (n = 7 samples of 3 individuals). L6 larvae  
113 for IF were pulled from both the Sympton and Reptiworms populations, which did not differ in  
114 mean body mass or final brain/VNC counts.

### 115 Immunohistochemistry

116 Immunohistochemistry was used to obtain cell numbers for L1 and L4 larvae, and to obtain  
117 representative images of the three larval instars and adult brains. Brains were dissected as in the  
118 preceding section except the optic lobes and retinas were left attached to the central brain for adults  
119 and larval ventral nerve cords were left attached to the central brain. For larval samples the nervous  
120 system was rinsed in PBS then incubated in a small volume of SYTOX Green (1:5000 in PBS) for 30  
121 minutes. The nervous system was then cleared in increasing steps of glycerol (40%, 60%, 80% in  
122 PBS) at 35 °C and mounted on a slide with a polyvinyl alcohol mounting medium, Mowiol® 4-88  
123 (Sigma-Aldrich), and covered with a #1.5 coverslip. Adult brains were embedded in 10% low-  
124 melting agarose and sectioned at 100 µm on a vibratome. Sections were then processed and  
125 mounted as described for larval brains. Samples were imaged on a Zeiss LSM 880 inverted confocal  
126 microscope. Larval brains were imaged using a 40x/1.3 Oil DIC M27 objective with optical section  
127 thickness of 1 µm (L1), 2 µm, (L4) or 3 µm (L6). Adult brains were imaged using a 20x/0.8 M27  
128 lens with images acquired at an optical section thickness of 8 µm. Two observers counted each L1  
129 and L4 (n = 2/instar) brain (VNC separately from the brain) and their counts were averaged.

### 130 Statistical Analysis

131 GraphPad Prism v. 9.1.2 (GraphPad Prism for Windows 2021) was used for all statistical  
132 analyses. Shapiro-Wilk normality tests and an F-test for equal variance were used to determine if  
133 data met the assumptions of parametric tests. An unpaired t-test was used to analyze categorical  
134 differences between adult males and females in body mass, head width, head height, relative OL  
135 mass, and total brain cell numbers. Linear regressions were used to analyze the relationship between  
136 body mass and head width/height, brain mass (of males and females), OL mass (of males and  
137 females), CB mass (of all adults), and CB, OL, and total brain cell densities (of all adults). A  
138 quadratic regression was used to analyze the relationship between body and relative brain mass, and  
139 the fit was compared to a linear regression. Due to unequal variance, a Welch's ANOVA with  
140 Dunnett's T3 multiple comparisons test was used to assess differences in the number of cells in male  
141 and female OLs and CB; a one-way ANOVA with Bonferroni MCT was used to assess differences  
142 in the cell densities of male and female OLs and CBs.

## 143 **Results**

### 144 Description of the Larval Brain

145 The larval brain consists of two attached, spherical lobes, similar to *Drosophila melanogaster* (Figure 1).  
146 The lobes of the brain each connect to the first of the twelve segmented ganglia of the VNC. The  
147 twelve ganglia of the VNC each innervate one of the twelve body segments (including the head) of  
148 the larvae; each ganglion is composed of two, symmetrical regions that presumably innervate the left  
149 and the right sides of the body. While the VNC extends through nearly the entire body of an L1, it  
150 only extends through body segments 3 – 6 of the much larger L6.

### 151 Changes in Total Brain Cell Numbers Across Development

152 There was an 8.8-fold increase in total brain cell number (from  $2,314 \pm 71$  to  $20,355 \pm 2,780$ ) with a  
153 257-fold change in body mass across larval development (Table 1). During pupation, as the brain

154 developed functionally discrete regions (Figure 1), flies produced a 16.2-fold increase in brain cell  
 155 numbers ( $330,737 \pm 62,376$ ; Table 1).

156

157 **Table 1. Changes in brain cell number across developmental stages and body mass.**

| Life stage (mean body mass, mg) | Mean total number of brain cells $\pm$ SD | Method (n)                               |
|---------------------------------|-------------------------------------------|------------------------------------------|
| L1 (0.025)                      | $2,314 \pm 71$                            | IHC + Counting (n = 2)                   |
| L4 ( $15.32 \pm 4.02$ )         | $11,529 \pm 1,294$                        | IHC + Counting (n = 2)                   |
| L6 ( $64.18 \pm 9.03$ )         | $20,355 \pm 2,780$                        | IF (n = 7 samples, 3 individuals/sample) |
| Adult ( $37.98 \pm 8.15$ )      | $330,737 \pm 62,376$                      | IF (n = 23)                              |
| F only ( $41.23 \pm 8.52$ )     | $299,011 \pm 59,519$                      | IF (n = 12)                              |
| M only ( $34.44 \pm 6.32$ )     | $365,347 \pm 46,233$                      | IF (n = 11)                              |

158

159 The number of cells in the larval VNC increased more slowly brain mass across developmental  
 160 stages (Figure 2A). L1 have  $2,684 \pm 186$  cells, L4 have  $12,249 \pm 1,153$ , and L6 have  $16,146 \pm 1,386$   
 161 cells in the VNC, a 6-fold increase in VNC cell number across development.

162 Body Size Effects and Sexual Dimorphism in Adults

163 Males in our sample had reduced mean body sizes compared to females, as measured by  
 164 mass (Unpaired t-test,  $t = 2.15$ ,  $df = 21$ ,  $p = 0.043$ ; males, range: 22.15 – 42.42 mg; females, range:  
 165 32.30 – 56.43 mg), but not head width ( $t = 1.69$ ,  $df = 21$ ,  $p = 0.10$ ) or head height ( $t = 0.78$ ,  $df = 21$ ,  
 166  $p = 0.45$ ). Head width and head height scaled hypoallometrically with adult body mass, suggesting  
 167 that larger head sizes are prioritized at small body sizes (HW:  $\log [\text{head width}] = 0.45 \log [\text{body}$   
 168  $\text{mass}^{1/3}] + 0.28$ ,  $F = 32.83$ ,  $df = 21$ ,  $p < 0.0001$ ,  $R^2 = 0.61$ ; HH:  $\log [\text{head height}] = 0.31 \log [\text{body}$   
 169  $\text{mass}^{1/3}] + 0.14$ ,  $F = 7.97$ ,  $df = 21$ ,  $p = 0.01$ ,  $R^2 = 0.27$ ).

170 Across adults, relative brain mass increase non-linearly with decreasing body mass in  
 171 accordance with Haller's rule ( $[\text{Brain:body mass}] = 1.23 e^{-0.5} [\text{body mass}]^2 - 0.001 [\text{body mass}] + 0.04$ ,  
 172  $F = 7.20$ ,  $df = 20$ ,  $p = 0.0143$ ,  $R^2 = 0.61$ ). Female and male brain mass scaled hypoallometrically



173 with body mass, but at different rates ( $F = 7.43$ ,  $df = 19$ ,  $p = 0.0134$ ); female brains increased in  
174 mass as body size increased, while male brain mass was unaffected by increasing body mass (females:  
175  $\log [\text{brain mass}] = 0.51 \log [\text{body mass}] - 1.07$ ,  $F = 7.33$ ,  $df = 10$ ,  $p = 0.022$ ,  $R^2 = 0.42$ ; males:  $F =$   
176  $0.91$ ,  $df = 9$ ,  $p = 0.37$ ).

177 The relationship between brain and body mass was driven by differences in OL scaling, as  
178 adult OLs accounted for  $74\% \pm 4\%$  of total brain mass (no difference in relative OL mass in males  
179 and females; Unpaired t-test:  $t = 0.19$ ,  $df = 21$ ,  $p = 0.85$ ). Female OLs scaled hypoallometrically with  
180 body mass, while male OL mass was unaffected by body size (females:  $\log [\text{OL mass}] = 0.52 \log$   
181  $[\text{body mass}] - 1.20$ ,  $F = 13.70$ ,  $df = 10$ ,  $p = 0.0041$ ,  $R^2 = 0.58$ ; males:  $F = 0.58$ ,  $df = 9$ ,  $p = 0.47$ ). CB  
182 mass was unaffected by body size in adults ( $F = 2.36$ ,  $df = 21$ ,  $p = 0.14$ ).

183 Males had significantly more brain cells than females (Table 1, Figure 2B; Unpaired t-test:  $t$   
184  $= 2.97$ ,  $df = 21$ ,  $p = 0.0074$ ). This difference was due to increased numbers of cells in their optic  
185 lobes, but not the central brain region (Figure 2B; Welch's ANOVA:  $W = 180.20$ ,  $df = 20.30$ ,  $p <$   
186  $0.0001$ ; Dunnett's T3 MCT, OL:  $t = 2.91$ ,  $df = 20.12$ ,  $p = 0.0171$ ; CB:  $t = 1.00$ ,  $df = 17.74$ ,  $p =$   
187  $0.55$ ). Males had  $321,776 \pm 44,636$  cells in their optic lobes compared to  $257,566 \pm 60,579$  for  
188 females. Adults had  $42,462 \pm 5,222$  cells in the central brain region.

189 Across adults, cell density (nuclei/mg) in the OL and total brain decreased as body mass  
190 increased, while CB density remained statistically similar, but trended towards decreasing (Total:  
191  $[\text{brain cell density}] = -9405 [\text{body mass}] + 996185$ ,  $F = 6.23$ ,  $df = 21$ ,  $p = 0.021$ ,  $R^2 = 0.23$ ; OL:  $[\text{OL}$   
192  $\text{cell density}] = -8300 [\text{body mass}] + 872429$ ,  $F = 5.27$ ,  $df = 21$ ,  $p = 0.0322$ ,  $R^2 = 0.20$ ; CB:  $F = 4.19$ ,  
193  $df = 21$ ,  $p = 0.054$ ). Males had more dense brains than females in the OL but not the CB (ANOVA:  
194  $F = 40.41$ ,  $df = 42$ ,  $p < 0.0001$ ; Bonferroni MCT, OL:  $t = 6.10$ ,  $df = 42$ ,  $p < 0.0001$ ; CB:  $t = 1.79$ ,  
195  $df = 42$ ,  $p = 0.16$ ).

## 196 Discussion

197 In this study, we provide the first images of the *H. illucens* brain across development. In  
198 addition, we determine how developmental stage impacts brain cell numbers, both across larval  
199 stages and following metamorphosis, completing the first intraspecific developmental comparison of  
200 brain cell numbers using IF. Finally, we separately compare the central brain and optic lobes of male  
201 and female *H. illucens*, and find sexual dimorphism in the adult OLs but not the CB, which has not  
202 been reported in other Diptera.

203 First instar *D. melanogaster* larvae have 2,000 cells in the brain – roughly comparable to *H.*  
204 *illucens* (Scott et al. 2001, Nassif et al. 2002, Avalos et al. 2019). Third (final) instar *D. melanogaster*  
205 larvae have an estimated 8-10,000 cells in the brain (Nassif et al. 2002, Thum & Gerber 2019); this  
206 appears roughly comparable to the third stage of *H. illucens* (as the fourth stage brain contained  
207 ~13,000 cells), suggesting there may be certain common developmental rules may regulate neuronal  
208 differentiation during larval molts in this region across some species. *H. illucens* have another three  
209 molts before pupation, and the brain reaches 20,000 cells by the final L6 stage.

210 *H. illucens* adults have two to three times the number of protocerebral brain cells as *D.*  
211 *melanogaster* (most *D. melanogaster* counts range from 93,000 through 133,000; Godfrey et al. 2021,  
212 Scheffer et al. 2020, Mu et al. 2022; but some estimate 208,000 cells, Raji & Potter 2021). The vast  
213 majority of this increase in cell number is likely due to the optic lobes. *D. melanogaster* have around  
214 25,000 cells in the CB (Scheffer et al. 2020; though Mu et al. 2022 estimate 43,000, and Raji & Potter  
215 2021 estimate 101,000), as compared to our estimate of 42,000 in *H. illucens* adults. OL cell number  
216 estimates in *D. melanogaster* (90,000 in Mu et al. 2022; 107,000 in Raji & Potter 2021) are much lower  
217 than the 250,000 and 320,000 cells in the OLs of female and male *H. illucens*, respectively. OL cell  
218 nuclei were noticeably smaller than those in the CB (Figure 1) similar to *D. melanogaster* (Mu et al.  
219 2022).

220           Quality of the larval diet is known to impact neurogenesis – reduced diet quality decreases  
221 the number but not diversity of cells in adult visual centers in *D. melanogaster* (Lanet et al. 2013).  
222 Body size is linked to diet quality, rearing density, and temperature in *H. illucens* (Chia et al. 2018,  
223 Barragan-Fonseca et al. 2018, Jones & Tomberlin 2019, Gobbi et al. 2013, Addeo et al. 2021), and  
224 growth and development time can also vary significantly between populations of insects (Edgar  
225 2006, Zhao et al. 2013). It is possible that diet, temperature, or source population may affect the  
226 total number of brain cells estimated for an insect species.

227           The increased number of OL cells in adult males is surprising. There is no obvious sexual  
228 dimorphism in eye morphology between males and females (as in honey bees, for example; Streinzer  
229 et al. 2013). Other Dipterans (such as *D. melanogaster*, or the mosquito species: *Aedes aegypti*, *Anopheles*  
230 *coluzzii*, and *Culex quinquefasciatus*; Raji & Potter 2021) do not demonstrate differences in optic lobe  
231 cell numbers between males and females. In natural conditions, *H. illucens* gather in leks to chase  
232 after and mate with females. Males often engage in aggressive, territorial, or courtship interactions  
233 with other males (Tomberlin & Sheppard 2001, Giunti et al. 2018). However, the sensory signals  
234 used by males to distinguish receptive females vs. unreceptive males are still unclear. Many male  
235 insects use a combination of chemosensory, acoustic, or visual cues to locate females (Benelli et al.  
236 2014, Bonduriansky 2001). In *H. illucens*, acoustic signals are likely necessary for male courtship  
237 initiation (Giunti et al. 2018). However high-intensity light conditions with specific spectral  
238 characteristics have proven to be absolutely critical for encouraging mating in both captive and  
239 outdoor populations (Oonincx et al. 2016, Tomberlin & Sheppard 2002, Tingle 1975, Liu et al. 2020,  
240 Zhang et al. 2010, Macavei et al. 2020, Klüber et al. 2020, Heussler et al. 2018, Holmes 2010,  
241 Nakamura et al. 2016, Schneider 2020). This behavioral data, supported by the increased number of  
242 brain cells we found in the optic lobes of males, suggests that visual cues may also be very important  
243 for mediating some aspects of male mating behaviors.

244           This study is the first to describe the structure of the BSF larval and adult central nervous  
245 systems. Our results provide evidence for patterns of larval brain cell development in a second  
246 Dipteran species and demonstrate the use of IF for intraspecific comparisons across and within life  
247 stages. Our data suggest there is sexual dimorphism in the OLs of adults, which supports previous  
248 behavioral data demonstrating the importance of light conditions for BSF mating behaviors. Overall,  
249 our study suggests that IF can be used to more easily determine developmental patterns of brain  
250 complexity (as measured by brain cell number) in a wider variety of arthropod taxa, as well as  
251 intraspecific variation due to sexual dimorphism, age, diet, developmental conditions, and more.

## 252 **Acknowledgements**

253 The Stanford Laboratory at Drexel University provided use of their incubator for specimen rearing.  
254 Wulfila Gronenberg provided extra reagents and equipment, as well as essential methodological  
255 guidance. We would like to thank Patty Jansma at the University of Arizona Imaging Core Optical  
256 facility for her microscopy advice and support.

257

258 **Figures**

259 Figure 1

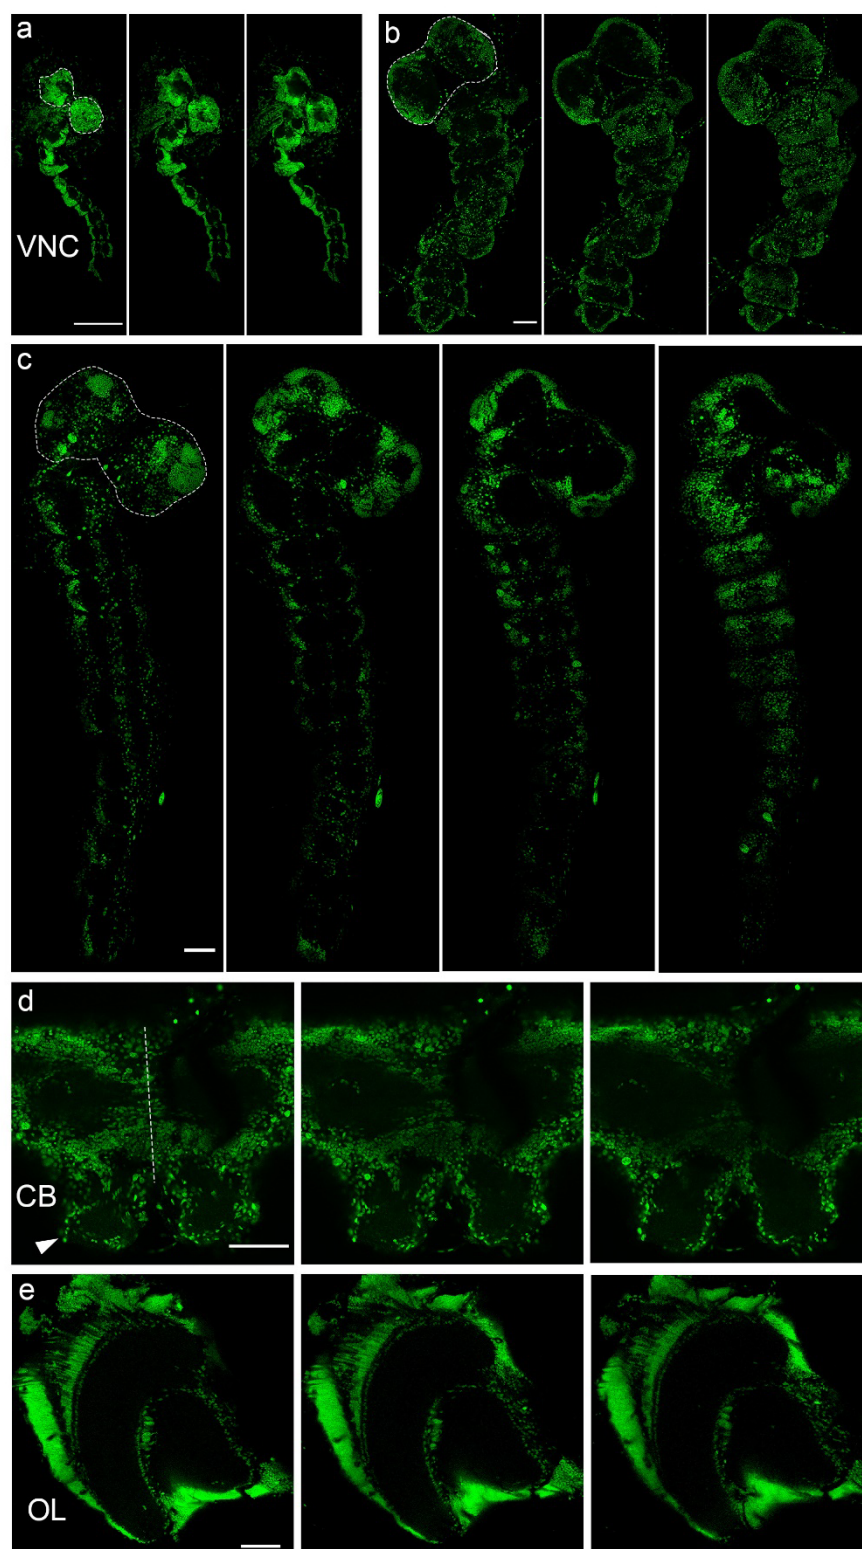

261 Figure 2

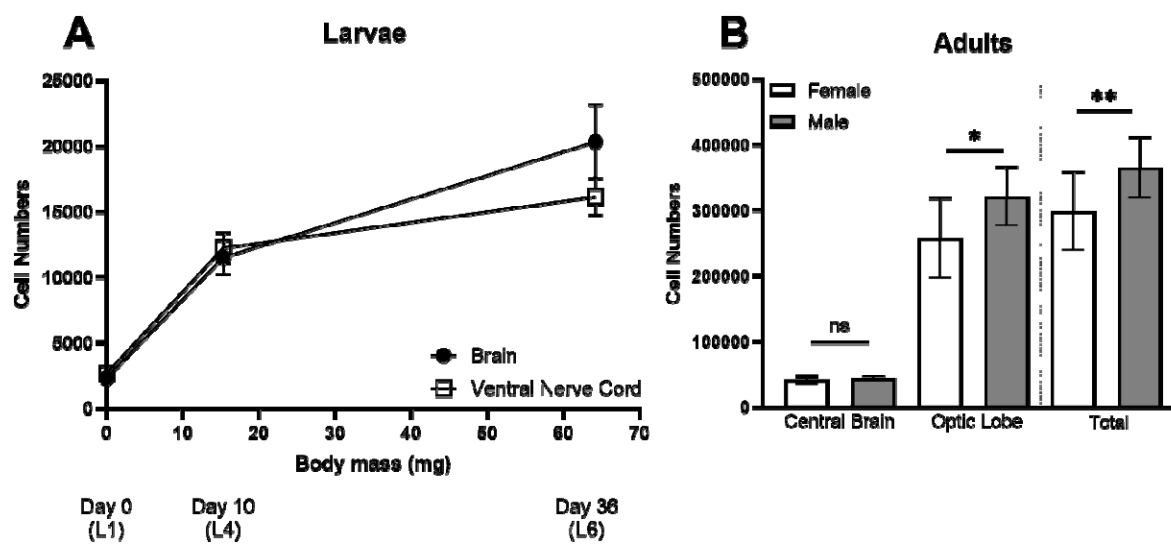

262

263 **Figure Legends**

264 **Figure 1. Central nervous system development in the Black Soldier Fly.** Subsections of  
265 SYTOX Green labelled tissue imaged at 40x from (a) first (L1), (b) fourth (L4), and (c) sixth (L6)  
266 instar nervous systems showing the brain (dotted outline) and ventral nerve cord (VNC).  
267 Subsections from the adult (d) central brain (CB) and (e) optic lobes (OL) imaged at 20x and labelled  
268 with SYTOX Green. In (d) dotted line denotes brain midline and arrow indicates left antennal lobe.  
269 Scale bars = 100  $\mu$ m.

270 **Figure 2. Brain cell numbers during larval development and in male vs. female adult Black**  
271 **soldier flies.** A) Black soldier fly larvae have increased brain and ventral nerve cord cell numbers.  
272 Brain and ventral nerve cord cell numbers increase faster, compared to body mass, earlier in  
273 development (L1 – L4) as opposed to later in development (L4 – L6). B) Adult, male *H. illucens* have  
274 an increased total number of brain cells compared to females (Unpaired t-test:  $t = 2.97$ ,  $df = 21$ ,  $p =$   
275  $0.0074$ ). This difference is driven by differences in the optic lobes (Welch's ANOVA:  $W = 180.20$ ,  
276  $df = 20.30$ ,  $p < 0.0001$ ; Dunnett's T3 MCT, OL:  $t = 2.91$ ,  $df = 20.12$ ,  $p = 0.0171$ ), as males and  
277 females have the same number of cells in the central brain (CB:  $t = 1.00$ ,  $df = 17.74$ ,  $p = 0.55$ ). ns =  
278 not significant; \* =  $p < 0.05$ ; \*\* =  $p < 0.01$

279

280

281

282 **References**

- 283 Addeo NF, Li C, Rusch TW, Dickerson AJ, Tarone AM, Bovera F, Tomberlin JK. 2021. Impact of  
284 age, size, and sex on adult black soldier fly [*Hermetia illucens* L. (Diptera: Stratiomyidae)]  
285 thermal preference. *Journal of Insects as Food and Feed*, in press.
- 286 Avalos CB, Maier GL, Bruggmann R, Sprecher SG. 2019. Single cell transcriptome atlas of the  
287 *Drosophila* larval brain. *eLife*, 8: e50354.
- 288 Banks IJ. 2014. To assess the impact of Black Soldier Fly (*Hermetia illucens*) larvae on faecal  
289 reduction in pit latrines. [Dissertation]. London School of Hygiene & Tropical Medicine.
- 290 Barragan-Fonseca KB, Dicke M, van Loon JJA. 2018. Influence of larval density and dietary  
291 nutrient concentration on performance, body protein, and fat contents of black soldier fly  
292 larvae (*Hermetia illucens*). *Entomologia Experimentalis et Applicata*, 166: 761-770.
- 293 Benelli G, Daane KM, Canale A, Niu CY, Messing RH, Vargas RI. 2014. Sexual communication and  
294 related behaviours in Tephritidae: Current knowledge and potential applications for  
295 Integrated Pest Management. *Journal of Pest Science*, 87: 385–405.
- 296 Bonduriansky R. 2001. The evolution of male mate choice in insects: a synthesis of ideas and  
297 evidence. *Biological Reviews*, 76: 305–339.
- 298 Buehlmann C, Mangan M, Graham P. 2020. Multimodal interactions in insect navigation. *Animal*  
299 *Cognition*, 23: 1129-1141.
- 300 Cheng JYK, Chiu SLH, Lo IMC. 2017. Effects of moisture content of food waste on residue  
301 separation, larval growth and larval survival in black soldier fly bioconversion. *Waste*  
302 *Management*, 67: 315-323.
- 303 Chia SY, Tanga CM, Khamis FM, Mohamed SA, Salifu D, Sevgan S, et al. (2018). Threshold  
304 temperatures and thermal requirements of black soldier fly *Hermetia illucens*. Implications for  
305 mass production. *PLoS ONE*, 13: e0206097.



- 306 Chia SY, Tanga CM, van Loon JJ, Dicke M. 2019. Insects for sustainable animal feed: Inclusive  
307 business models involving smallholder farms. *Current Opinion in Environmental Sustainability*,  
308 41: 23-30.
- 309 Copello A. 1926. Biología de *Hermetia illucens*. *Latr. Rev. Sco. Entomol. Argentina*, 1: 23–27.
- 310 Detrain C, Deneubourg JL, Pasteels JM. 1999. “Decision-making in foraging by social insects.” In:  
311 Detrain C, Deneubourg JL, Pasteels JM (eds). *Information Processing in Social Insects*. Birkhäuser,  
312 Basel.
- 313 Dukas R, Clark CW, Abbott K. 2006. Courtship strategies of male insects: When is learning  
314 advantageous? *Animal Behavior*, 72: 1395-1404.
- 315 Edgar BA. 2006. How flies get their size: Genetics meets physiology. *Nature Reviews Genetics*, 7: 907-  
316 916.
- 317 Giunti G, Campolo O, Laudani F, Palmeri V. 2018. Male courtship behaviour and potential for  
318 female mate choice in the black soldier fly *Hermetia illucens* L. (Diptera: Stratiomyidae).  
319 *Entomologia Generalis*, 38: 29-46.
- 320 Giurfa M. 2015. Learning and cognition in insects. *WIREs Cognitive Science*, 6: 383-395.
- 321 Gobbi P, Martínez-Sánchez A, Rojo S. 2013. The effects of larval diet on adult life-history traits of  
322 the black soldier fly, *Hermetia illucens* (Diptera: Stratiomyidae). *European J Entomology*, 110:  
323 461-468.
- 324 Godfrey RK, Swartzlander M, Gronenberg W. 2021. Allometric analysis of brain cell number in  
325 Hymenoptera suggests ant brains diverge from general trends. *Proceedings of the Royal Society B*,  
326 288: 20210199.
- 327 GraphPad Software. 2021. GraphPad Prism v 9.1.2 for Windows. La Jolla, CA.
- 328 Herculano-Houzel S, Lent R. 2005. Isotropic fractionator: A simple, rapid method for the

- 329            quantification of total cell and neuron numbers in the brain. *Journal of Neuroscience*, 25: 2518–  
330            2521.
- 331 Heussler CD, Walter A, Oberkofler H, Insam H, Arthofer W, Schlick-Steiner BC, Steiner FM. 2018.  
332            Influence of three artificial light sources on oviposition and half-life of the Black Soldier  
333            Fly, *Hermetia illucens* (Diptera: Stratiomyidae): Improving small-scale indoor rearing. *PLoS*  
334            *One*, 13(5): e0197896.
- 335 Holmes L. 2010. Role of abiotic factors on the development and life history of the Black Soldier  
336            Fly, *Hermetia illucens* (L.) (Diptera: Stratiomyidae). [PhD Dissertation]. University of Windsor.
- 337 Hopkins I, Newman LP, Gill H, Danaher J. 2021. The influence of food waste rearing substrates on  
338            black soldier fly larvae protein composition: A systematic review. *Insects*, 12: 608.
- 339 Jones BM, Tomberlin JK. 2019. Impact of larval competition on life-history traits of the black  
340            soldier fly (Diptera: Stratiomyidae). *Annals of the Entomological Society of America*, 112: 505-510.
- 341 Julita U, Fitri LL, Putra RE, Permana AD. 2020. Mating success and reproductive behavior of black  
342            soldier fly *Hermetia illucens* L. (Diptera, Stratiomyidae) in Tropics. *Journal of Entomology*, 17:  
343            117-127.
- 344 Julita U, Suryani Y, Kinasih I, Yuliawati A, Cahyanto T, Maryeti Y, Permana AD, Fitri LL. 2018.  
345            Growth performance and nutritional composition of black soldier fly, *Hermetia illucens* (L),  
346            (Diptera: Stratiomyidae) reared on horse and sheep manure. *IOP Conference Series, Earth and*  
347            *Environmental Science*, 187: 012071.
- 348 Kaya C, Generalovic TN, Ståhls G, Hauser M, Samayoa AC, Nunes-Silva CG... Sandrock C. 2021.  
349            Global population genetic structure and demographic trajectories of the black soldier fly,  
350            *Hermetia illucens*. *BMC Biology*, 19: 94.
- 351 Kim W, Bae S, Park H, Park K, Lee S, Choi Y, Han S, Koh Y. 2010. The larval age and mouth  
352            morphology of the Black Soldier Fly, *Hermetia illucens* (Diptera: Stratiomyidae). *International*

- 353 *Journal of Industrial Entomology*, 21: 185-187.
- 354 Klüber P, Bakonyi D, Zorn H, Rühl M. 2020. Does light color temperature influence aspects of  
355 oviposition by the black soldier fly (Diptera: Stratiomyidae)? *Journal of Economic Entomology*,  
356 113: 2549-2552.
- 357 Lanet E, Gould AP, Maurange C. 2013. Protection of neuronal diversity at the expense of neuronal  
358 numbers during nutrient restriction in the *Drosophila* visual system. *Cell Reports*, 3: 587-594.
- 359 Lee KS, Yun EY, Goo TW. 2021. Optimization of feed components to improve *Hermetia illucens*  
360 growth and development of oil extractor to produce biodiesel. *Animals*, 11: 2573.
- 361 Liu Z, Najar-Rodriguez AJ, Minor MA, Hedderley DI, Morel PCH. 2020. Mating success of the  
362 black soldier fly, *Hermetia illucens* (Diptera: Stratiomyidae) under four artificial light sources.  
363 *Journal of Photochemistry & Photobiology, B*, 205: 111815.
- 364 Macavei LI, Benassi G, Stoian V, Maistrello L. 2020. Optimization of *Hermetia illucens* (L.) egg laying  
365 under different nutrition and light conditions. *PLoS ONE*, 15: e0232144.
- 366 Marshall SA, Woodley NE, Hauser M. 2015. The historical spread of the black soldier fly, *Hermetia*  
367 *illucens* (L.) (Diptera, Stratiomyidae, Hermetiinae), and its establishment in Canada. *J Ent Soc*  
368 *Ont*, 146: 51–54.
- 369 Mu S, Yu S, Turner NL, McKellar CE, Dorkenwald S, Collman F... Seung HS. 2022. 3D  
370 reconstruction of cell nuclei in a full *Drosophila* brain. Preprint available at:  
371 <https://www.biorxiv.org/content/10.1101/2021.11.04.467197v1>
- 372 Nakamura S, Ichiki RT, Shimoda M, Morioka S. 2016. Small-scale rearing of the black soldier fly,  
373 *Hermetia illucens* (Diptera: Stratiomyidae), in the laboratory: low-cost and year-round rearing.  
374 *Applied Entomological Zoology*, 51: 161-166.
- 375 Nassif C, Noveen A, Hartenstein V. 2002. Early development of the *Drosophila* brain: III. The  
376 pattern of neuropile founder tracts during the larval period. *Journal of Comparative Neurology*,

- 377 455: 417-434.
- 378 Oonincx DGAB, Volk N, Diehl JJE, van Loon JJA, Belušić G. 2016. Photoreceptor spectral  
379 sensitivity of the compound eyes of black soldier fly (*Hermetia illucens*) informing the design  
380 of LED-based illumination to enhance indoor reproduction. *Journal of Insect Physiology*, 95:  
381 133-139.
- 382 Pierce JD. 1986. A review of tool use in insects. *The Florida Entomologist*, 69: 95-104.
- 383 Raji JI, Potter CJ. 2021. The number of neurons in *Drosophila* and mosquito brains. *PLoS ONE*, 16:  
384 e0250381.
- 385 Ritzmann RE, Harley CM, Daltorio KA, Tietz BR, Pollack AJ, Bender JA... Quinn RD. 2012.  
386 Deciding which way to go: How do insects alter movements to negotiate barriers? *Frontiers in*  
387 *Neuroscience*, 6: 97.
- 388 Rowe A. 2020. Insects raised for food and feed - global scale, practices, and policies. *Effective*  
389 *Altruism*. Retrieved from: [https://forum.effectivealtruism.org/posts/](https://forum.effectivealtruism.org/posts/ruFmR5oBgqLgTcP2b/insects-raised-for-food-and-feed-global-scale-practices-and#Black_soldier_flies1)  
390 [ruFmR5oBgqLgTcP2b/insects-raised-for-food-and-feed-global-scale-practices-and#Black\\_s](https://forum.effectivealtruism.org/posts/ruFmR5oBgqLgTcP2b/insects-raised-for-food-and-feed-global-scale-practices-and#Black_soldier_flies1)  
391 [oldier\\_flies1](https://forum.effectivealtruism.org/posts/ruFmR5oBgqLgTcP2b/insects-raised-for-food-and-feed-global-scale-practices-and#Black_soldier_flies1). Last accessed on 1/24/2022.
- 392 Scheffer LK, Xu SC, Januszewski M, Lu Z, Takemura S, Hayworth KJ... Maitlin-Shepard J. 2020. A  
393 connectome and analysis of the adult *Drosophila* central brain. *eLife*, 9: e57443.
- 394 Schindelin J, Arganda-Carreras I, Frise E, Kaynig V, Longair M, Pietzsch T, ... Cardona A. 2012.  
395 Fiji: an open-source platform for biological-image analysis. *Nature Methods*, 9: 676–682.
- 396 Schneider JC. 2020. Effects of light intensity on mating of the black soldier fly (*Hermetia illucens*,  
397 Diptera: Stratiomyidae). *Journal of Insects as Food and Feed*, 6: 111-119.
- 398 Scott K, Brady R, Craychik A, Morozov P, Rzhetsky A, Zuker C, Axel R. 2001. A chemosensory  
399 gene family encoding candidate gustatory and olfactory receptors in *Drosophila*. *Cell*, 104: 661-  
400 673.

- 401 Sheehan MJ, Tibbetts EA. 2011. Specialized face learning in association with individual recognition  
402 in paper wasps. *Science*, 334: 6060.
- 403 Sheppard DC, Newton GL, Thompson SA, Savage S. 1994. A value added manure management  
404 system using the black soldier fly. *Bioresource Technology*, 50: 275-279.
- 405 Streinzer M, Brockmann A, Nagaraja N, Spaethe J. 2013. Sex and caste-specific variation in  
406 compound eye morphology of five honeybee species. *PLOS One*, 8: e57702.
- 407 Surendra KC, Olivier R, Tomberlin JK, Jha R, Khanal SK. 2016. Bioconversion of organic wastes  
408 into biodiesel and animal feed via insect farming. *Renewable Energy*, 98: 197-202.
- 409 Thum AS, Gerber B. 2019. Connectomics and function of a memory network: the mushroom body  
410 of larval *Drosophila*. *Current Opinion in Neurobiology*, 54: 146-154.
- 411 Tingle FC, Mitchell ER, Copeland WW. 1975. The soldier fly, *Hermetia illucens*, in poultry houses in  
412 North Central Florida. *Journal of the Georgia Entomological Society*, 10: 179-183.
- 413 Tomberlin JK, Sheppard DC. 2001. Lekking behavior of the black soldier fly (Diptera:  
414 Stratiomyidae). *Florida Entomologist*, 84: 729–730.
- 415 Tomberlin JK, Sheppard DC. 2002. Factors influencing mating and oviposition of Black Soldier  
416 Flies (Diptera: Stratiomyidae) in a colony. *Journal of Entomological Science*, 37: 345-352.
- 417 van Zweden JS, d’Ettorre P. 2011. “Nestmate recognition in social insects and the role of  
418 hydrocarbons.” In: Blomquist GJ, Bagnères A (eds). *Insect Hydrocarbons: Biology, Biochemistry,*  
419 *and Chemical Ecology*. Cambridge University Press.
- 420 Widjastuti T, Wiradimadja R, Rusmana D. 2014. The effect of substitution of fish meal by black  
421 soldier fly (*Hermetia illucens*) maggot meal in the diet on production performance of quail  
422 (*Coturnix coturnix japonica*). *Animal Science*, 62: 125-129.
- 423 Zhao F, Tomberlin JK, Zheng L, Yu Z, Zhang J. 2013. Developmental and waste reduction  
424 plasticity of three black soldier fly strains (Diptera: Stratiomyidae) raised on different

- 425           livestock manures. *J. Med Entomology*, 50: 1224-1230.
- 426   Zhang J, Huang L, He J, Tomberlin JK, Li J, Lei C, Sun M, Liu Z, Yu Z. 2010. An artificial light
- 427           source influences mating and oviposition of black soldier flies, *Hermetia illucens*. *Journal of*
- 428           *Insect Science*, 10: Article 202.
- 429
